# Supplementary material for: Impatto economico di 14 programmi di uso compassionevole dei farmaci in Italia, nella prospettiva del Servizio Sanitario Nazionale
Source: PubMed Central journal article supplement — Glob Reg Health Technol Assess. 2024 May 21;11:115–23. [Article in Italian] doi: 10.33393/grhta.2024.2735 (PMC11129630; doi:10.33393/grhta.2024.2735), 2024-05-21
Supplement: supplementary_table_A.pdf [file supplementary_table_A.pdf]

| Programma                              | Aggiornamento rispetto a (9) | Indicazione terapeutica in CUP                                                                                                                                       | Status rimborso farmaco CUP | Pazienti CUP (agosto 2022) | Apertura del programma | Terapie alternative                                                                                                                                                                                                 | Pazienti CUP (inclusi in analisi) | Fonte costo terapie alternative                                                                                                                                                                                         | Costo unitario terapie alternative |           | Prestazioni diagnostiche                                |                                         | Fonte CEA   | Costo netto unitario CEA |                  |                |              |
|----------------------------------------|------------------------------|----------------------------------------------------------------------------------------------------------------------------------------------------------------------|-----------------------------|----------------------------|------------------------|---------------------------------------------------------------------------------------------------------------------------------------------------------------------------------------------------------------------|-----------------------------------|-------------------------------------------------------------------------------------------------------------------------------------------------------------------------------------------------------------------------|------------------------------------|-----------|---------------------------------------------------------|-----------------------------------------|-------------|--------------------------|------------------|----------------|--------------|
|                                        |                              |                                                                                                                                                                      |                             |                            |                        |                                                                                                                                                                                                                     |                                   |                                                                                                                                                                                                                         | min                                | max       | Tipologia e fonte tariffa diagnostiche                  | Costo unitario prestazioni diagnostiche |             | Totale                   | Somministrazioni | Eventi avversi | Progressione |
| AG40661-Polatuzumab (DLBCL)            | NO                           | Linfoma diffuso a grandi cellule B recidivato o refrattario (r/r DLBCL)                                                                                              | Si (Determina 16/12/2021)   | 151                        | maggio 2019            | Tutti i pazienti<br>a) Rituximab + bendamustina<br>b) Lenalidome (648)                                                                                                                                              | 151                               | a) (1)<br>b) (2)                                                                                                                                                                                                        | 1.526 €                            | 56.658 €  | -                                                       | -                                       | (1)         | 258 €                    | 45 €             | -6 €           | 219 €        |
| AG40852-Entrectinib (NSCLC ROS-1+)*    | SI                           | Tumore solido metastatico o localmente avanzato positivo per traslocazioni di NTRK o carcinoma polmonare non a piccole cellule positivo per riarrangiamento di ROS-1 | Si (Determina 30/8/2021)    | 14                         | agosto 2019            | Solo NSCLC ROS-1+ (10 pazienti)<br>- Crizotinib                                                                                                                                                                     | 10                                | (2)                                                                                                                                                                                                                     | 79.019 €                           |           | -                                                       | -                                       | (9)         | 80.319 €                 | 0 €              | 138 €          | 80.181 €     |
| AG41381-Risdiplam (SMA1)*              | SI                           | Atrofia Muscolare Spinale di tipo 1 (SMA1)                                                                                                                           | Si (Determina 26/1/2022)    | 43                         | dicembre 2019          | Nessun paziente<br>- Pazienti in CUP non candidabili a trattamenti alternativi<br>- CEA include il confronto rispetto a BSC ma non è stata adattata al contesto italiano e la popolazione non è confrontabile a CUP | 0                                 | -                                                                                                                                                                                                                       | -                                  | -         | -                                                       | -                                       | -           | -                        | -                | -              | -            |
| AG42025-Risdiplam (SMA2)*              | SI                           | Atrofia Muscolare Spinale di tipo 2 (SMA2)                                                                                                                           | Si (Determina 26/1/2022)    | 147                        | maggio 2020            | Nessun paziente<br>- Pazienti in CUP non candidabili a trattamenti alternativi<br>- CEA non include il confronto rispetto ad assenza di trattamento                                                                 | 0                                 | -                                                                                                                                                                                                                       | -                                  | -         | -                                                       | -                                       | -           | -                        | -                | -              | -            |
| AG42295-Mosunetuzumab (FL)             | Nuovo                        | Linfoma follicolare recidivato/refrattario (r/r FL)                                                                                                                  | In attesa                   | 3                          | aprile 2022            | Tutti<br>a) Rituximab + Chemioterapia<br>b) Obinutuzumab + bendamustina<br>c) Idelalisib                                                                                                                            | 3                                 | a) (3) (media tra i costi riportati)<br>b) Elaborazione su Determina AIFA 309/2019 (GU 65 del 18-03-2019), Determina AIFA 718/2022 (GU 254 del 29-10-2022) e RCP obinutuzumab<br>c) Dossier Roche P&R per mosunetuzumab | 14.952 €                           | 117.839 € | -                                                       | -                                       | Dossier P&R | 146 €                    | 275 €            | -              | -129 €       |
| AG42296-Glofitamab (DLBCL, tFL, PMBCL) | Nuovo                        | Linfoma diffuso a grandi cellule B recidivato/refrattario (r/r DLBCL), linfoma follicolare trasformato (tFL) o linfoma primitivo a cellule B del mediastino (PMBCL)  | In attesa                   | 26                         | febbraio 2022          | Tutti<br>- Rituximab + Chemioterapia                                                                                                                                                                                | 26                                | (3)<br>(4)                                                                                                                                                                                                              | 7.576 €                            |           | -                                                       | -                                       | -           | -                        | -                | -              | -            |
| AG43320-Pralsetinib (NSCLC RET+)       | Nuovo                        | Carcinoma polmonare non a piccole cellule metastatico o localmente avanzato positivo per fusione di RET (prima linea)                                                | Si (Determina 7/11/2022)    | 63                         | aprile 2021            | Tutti<br>1L: a) pembrolizumab; b) chemioterapia a base di platino; c) combinazione tra i due<br>2L: a) docetaxel; b) docetaxel + nintedanib; c) atezolizumab/nivolumab/pembrolizumab                                | 63                                | Mix pazienti tra prima e seconda linea e quote per comparatori forniti da Roche<br>1L: a) (5); b) elaborazione su Determina AIFA 255/2022 (GU 80 del 05-04-2022) e RCP docetaxel<br>2L: a) (6); b) (7); c) (8) e (6)    | 6.109 €                            |           | IBRIDAZIONE CON SONDA MOLECOLARE (91.37.1) DM 22/7/1996 | 81,6                                    | Dossier P&R | -730 €                   | nd               | nd             | nd           |

| Programma                                      | Aggiornamento rispetto a (9) | Indicazione terapeutica in CUP                                                                                                             | Status rimborso farmaco CUP         | Pazienti CUP (agosto 2022) | Apertura del programma | Terapie alternative                                                                                                                          | Pazienti CUP (inclusi in analisi) | Fonte costo terapie alternative                                                                                                                                                                                | Costo unitario terapie alternative |          | Prestazioni diagnostiche                                                             |                                         | Fonte CEA   | Costo netto unitario CEA |                  |                |                     |
|------------------------------------------------|------------------------------|--------------------------------------------------------------------------------------------------------------------------------------------|-------------------------------------|----------------------------|------------------------|----------------------------------------------------------------------------------------------------------------------------------------------|-----------------------------------|----------------------------------------------------------------------------------------------------------------------------------------------------------------------------------------------------------------|------------------------------------|----------|--------------------------------------------------------------------------------------|-----------------------------------------|-------------|--------------------------|------------------|----------------|---------------------|
|                                                |                              |                                                                                                                                            |                                     |                            |                        |                                                                                                                                              |                                   |                                                                                                                                                                                                                | min                                | max      | Tipologia e fonte tariffa diagnostiche                                               | Costo unitario prestazioni diagnostiche |             | Totale                   | Somministrazioni | Eventi avversi | Progressione        |
| AG43388-Pralsetinib (Tiroide MTC e DTC)^       | Nuovo                        | Carcinoma midollare della tiroide metastatico o localmente avanzato positivo per mutazione di RET (MTC) o carcinoma della tiroide positivo | In attesa                           | 17                         | aprile 2021            | 16 pazienti (1 paziente non tipizzato e quindi assenza di alternative terapeutiche)<br>MTC (12 pazienti)<br>a) Vandetanib<br>b) Cabozantinib | 16                                | MTC<br>a) Determina AIFA 513/2013 (GU 150 del 28-06-2013)<br>b) Determina AIFA 775/2022 (GU 256 del 2-11-2022)                                                                                                 | 47.583 €                           | 56.611 € | IBRIDAZIONE CON SONDA MOLECOLARE (91.37.1) DM 22/7/1996                              | 81,6                                    | -           | -                        | -                | -              | -                   |
| AL41528-Atezolizumab (NSCLC)                   | Si                           | Carcinoma polmonare non a piccole cellule non squamoso in fase avanzata (stadio IV)                                                        | No (Rimborso per altre indicazioni) | 125                        | giugno 2019            | Tutti<br>a) Bevacizumab + paclitaxel + carboplatino<br>b) Pemetrexed                                                                         | 125                               | (2)                                                                                                                                                                                                            | 9.395 €                            | 33.761 € | -                                                                                    | -                                       | -           | -                        | -                | -              | -                   |
| AL41711-Trastuzumab emtansine (Mammella HER2+) | Si                           | Tumore mammario HER2 positivo                                                                                                              | Si (Determina 21/9/2021)            | 1255                       | settembre 2019         | Tutti<br>a) Trastuzumab+capecitabina<br>b) Lapatinib+capecitabina                                                                            | 1255                              | a) Dossier di P&R Roche<br>b) (2)                                                                                                                                                                              | 3.780 €                            | 6.854 €  | IBRIDAZIONE IN SITU (FISH) SU METAFASI, NUCLEI INTERFASICI, TESSUTI                  | 253,22                                  | Dossier P&R | 135 €                    | -2 €             | 75 €           | 62 €                |
| AL41712-Atezolizumab (TNBC)                    | Si                           | Cancro alla mammella triplo negativo (TNBC)                                                                                                | Si (Determina 14/7/20)              | 94                         | novembre 2019          | Tutti<br>- nab-paclitaxel                                                                                                                    | 94                                | (2)                                                                                                                                                                                                            | 7.036 €                            |          | -                                                                                    | -                                       | Dossier P&R | 2.139 €                  | 0 €              | 0 €            | 2.139 €             |
| MA30130-Ocrelizumab (PPMS)                     | Si                           | Sclerosi Multipla Primariamente Progressiva (PPMS)                                                                                         | Si (Determina 21/2/2022)            | 1045                       | giugno 2017            | Tutti (uso off label)<br>a) Fingolimod<br>b) Natalizumab<br>c) Interferone β-1a/b o glatiramer acetato                                       | 1045                              | a) Determina AIFA DG/400/2021 (GU 90 del 15-04-2021)<br>b) Determina AIFA 477/2023 /GU 167 del 19-07-2023)<br>c) Determina AIFA C 2729/2011 (GU 274 del 24-11-2011) e Determina 95/2016 (GU 29 del 05-02-2016) | 18.875 €                           |          | VIRUS EPATITE B [HBV] ANTICORPI HBsAg; VIRUS EPATITE B [HBV] ANTICORPI HBcAg IgM (9) | 19,5                                    | Dossier P&R | -14.196 €                | -                | -              | -14.196 €           |
| ML39740-Atezolizumab (Carcinoma uroteliale)    | Si                           | Carcinoma uroteliale                                                                                                                       | No (Rimborso per altre indicazioni) | 222                        | febbraio 2017          | Tutti<br>a) Docetaxel<br>b) Nivolumab<br>c) Pembrolizumab                                                                                    | 222                               | (2)                                                                                                                                                                                                            | 3.674 €                            | 32.223 € | -                                                                                    | -                                       | -           | -                        | -                | -              | -                   |
| ML40066-Alectinib (NSCLC ALK+ II)              | No                           | Carcinoma polmonare non a piccole cellule ALK+ trattato con crizotinib                                                                     | Si (Determina 7/8/2020)             | 226                        | maggio 2017            | Tutti<br>a) Pemetrexed (2 dosaggi)<br>b) Docetaxel<br>c) Ceritinib                                                                           | 226                               | (2)                                                                                                                                                                                                            | 2.984 €                            | 14.500 € | -                                                                                    | -                                       | Dossier P&R | -281 €                   | -280 €           | -167 €         | 166 €               |
| MO29499-Alectinib (NSCLC ALK+ I)               | No                           | Carcinoma polmonare non a piccole cellule ALK+                                                                                             | Si (Determina 7/8/2020)             | 21                         | maggio 2015            | Tutti<br>a) Crizotinib<br>b) Ceritinib                                                                                                       | 21                                | (2)                                                                                                                                                                                                            | 20.350 €                           | 44.860 € | BILIRUBINA TOTALE, BILIRUBINA TOTALE E FRAZIONATA, ALBUMINA-P, IHC (9)               | 106,3                                   | Dossier P&R | -60.180 €                | 0 €              | -113 €         | -60.067 €           |
| MO29746-Cobimetinib (Melanoma BRAF+)           | Si                           | Melanoma inoperabile o metastatico BRAF V600+                                                                                              | Si (Determina 14/9/2016)            | 228                        | marzo 2015             | Tutti<br>a) Vemurafenib<br>b) Dabrafenib + trametinib<br>c) Ceritinib                                                                        | 228                               | (2)                                                                                                                                                                                                            | 33.824 €                           | 41.274 € | -                                                                                    | -                                       | -           | -                        | -                | -              | -                   |
| <b>Totale</b>                                  |                              |                                                                                                                                            |                                     | <b>3.680</b>               |                        |                                                                                                                                              | <b>3.485</b>                      |                                                                                                                                                                                                                |                                    |          |                                                                                      |                                         |             |                          |                  |                | <b>Progressione</b> |
| <b>Totale inclusi in analisi</b>               |                              |                                                                                                                                            |                                     | <b>3.485</b>               |                        |                                                                                                                                              |                                   |                                                                                                                                                                                                                |                                    |          |                                                                                      |                                         |             |                          |                  |                |                     |

- Bellone M, Pradelli L, Caputo A, et al. Cost-Effectiveness and Cost-Utility Analyses of Polatuzumab Vedotin with Bendamustine and Rituximab vs. Bendamustine and Rituximab for the Treatment of Relapsed/Refractory Diffuse Large B-Cell Lymphoma. Value in Health. 2022;POS8109;25(1):Sup S82 (Accessed November 2023). [Link](#)
- Jommi C, Pantellini F, Stagi L, Vergykiou M, Cavazza M. The economic impact of compassionate use of medicines. BMC Health Serv Res. 2021;21(1):1303. [Link](#)
- Regione Veneto. 2015. Allegato B al Decreto n. 53 del 8/6/2016. Raccomandazione 3 (Dicembre 2015) (Accessed November 2023). [Link](#)
- Poesche V, Held G, Ziepert M, et al; FLYER Trial Investigators; German Lymphoma Alliance. Four versus six cycles of CHOP chemotherapy in combination with six applications of rituximab in patients with aggressive B-cell lymphoma with favourable prognosis (FLYER): a randomised, phase 3, non-inferiority trial. Lancet. 2019;394(10216):2271-2281. [Link](#)
- Regione Veneto. 2019. Allegato A al Decreto 68 dell'8/7/2019. Raccomandazione 26 (maggio 2019) (Accessed November 2023). [Link](#)
- Regione Veneto. 2016. Allegato A al Decreto 86 del 31/8/2016. Raccomandazione 21 (maggio 2016) (Accessed November 2023). [Link](#)
- Commissione oncologica regionale (Piemonte). Sintesi Pembrolizumab (Keytruda) II linea (Accessed November 2023). [Link](#)
- Regione Toscana. Commissione Terapeutica Regionale. 1/10/2018 (Accessed November 2023). [Link](#)
- Bellone M, Zaniolo O, Martinelli E, et al. Cost-utility of entrectinib versus crizotinib in ROS1+ NSCLC patients: an AUC model adapted to Italian clinical practice, PCN148. ISPOR 2019 (Accessed November 2023). [Link](#)

**Abbreviations** DLBCL: Linfoma diffuso a grandi cellule B; DTC: Carcinoma differenziato della tiroide; FL: Linfoma follicolare; MTC: Carcinoma midollare della tiroide; NSCLC: Tumore al polmone non a piccole cellule; PMBCL: Linfoma primitivo a cellule B del mediastino; PPMS: Sclerosi multipla primariamente progressiva; SMA: Atrofia muscolare spinale; tFL: Linfoma follicolare trasformato; TNBC, Cancro alla mammella triplo negativo
