# Supplementary material for: Impatto economico di 14 programmi di uso compassionevole dei farmaci in Italia, nella prospettiva del Servizio Sanitario Nazionale
Source: PubMed Central journal article supplement — Glob Reg Health Technol Assess. 2024 May 21;11:115–23. [Article in Italian] doi: 10.33393/grhta.2024.2735 (PMC11129630; doi:10.33393/grhta.2024.2735), 2024-05-21
Supplement: supplementary_table_B.pdf [file supplementary_table_B.pdf]

| Programma                                      | min      |          |         | max       |           |         |
|------------------------------------------------|----------|----------|---------|-----------|-----------|---------|
|                                                | media    | mediana  | IQR     | media     | mediana   | IQR     |
| AG40661-Polatumumab (DLBCL)                    | 1.526 €  | 1.526 €  | 0 €     | 56.658 €  | 56.658 €  | 0 €     |
| AG40852-Entrectinib (NSCLC ROS-1+)*            | 79.019 € | 79.019 € | 0 €     | 79.019 €  | 79.019 €  | 0 €     |
| AG42295-Mosunetuzumab (FL)                     | 14.952 € | 14.952 € | 0 €     | 117.839 € | 117.839 € | 0 €     |
| AG42296-Glofitamab (DLBCL, tFL, PMBCL)         | 7.576 €  | 7.576 €  | 0 €     | 7.576 €   | 7.576 €   | 0 €     |
| AG43320-Pralsetinib (NSCLC RET+)               | 6.109 €  | 6.109 €  | 0 €     | 6.109 €   | 6.109 €   | 0 €     |
| AG43388-Pralsetinib (Tiroide MTC e DTC)^       | 47.583 € | 47.583 € | 0 €     | 56.611 €  | 56.611 €  | 0 €     |
| AL41528-Atezolizumab (NSCLC)                   | 9.395 €  | 9.561 €  | 2.356 € | 33.761 €  | 33.357 €  | 9.067 € |
| AL41711-Trastuzumab emtansine (Mammella HER2+) | 3.780 €  | 3.780 €  | 0 €     | 6.854 €   | 6.854 €   | 0 €     |
| AL41712-Atezolizumab (TNBC)                    | 7.036 €  | 6.928 €  | 848 €   | 7.036 €   | 6.928 €   | 848 €   |
| MA30130-Ocrelizumab (PPMS)                     | 18.875 € | 18.875 € | 0 €     | 18.875 €  | 18.875 €  | 0 €     |
| ML39740-Atezolizumab (Carcinoma uroteliale)    | 3.674 €  | 3.674 €  | 0 €     | 32.223 €  | 32.223 €  | 0 €     |
| ML40066-Alectinib (NSCLC ALK+ II)              | 2.984 €  | 2.984 €  | 0 €     | 14.500 €  | 14.500 €  | 0 €     |
| MO29499-Alectinib (NSCLC ALK+ I)               | 20.350 € | 20.350 € | 0 €     | 44.860 €  | 44.860 €  | 0 €     |
| MO29746-Cobimetinib (Melanoma BRAF+)           | 33.824 € | 33.824 € | 0 €     | 41.274 €  | 41.274 €  | 0 €     |

#### Abbreviations

**DLBCL:** Linfoma diffuso a grandi cellule B; **DTC:** Carcinoma differenziato della tiroide; **FL:** Linfoma follicolare; **MTC:** Carcinoma midollare della tiroide; **NSCLC:** Tumore al polmone non a piccole cellule; **PMBCL:** Linfoma primitivo a cellule B del mediastino; **PPMS:** Sclerosi multipla primariamente progressiva; **SMA:** Atrofia muscolare spinale; **tFL:** Linfoma follicolare trasformato; **TNBC:** Cancro alla mammella triplo negativo
